# Supplementary material for: Evaluation of the Diagnostic Efficacy of Xpert CT/NG for Chlamydia trachomatis and Neisseria gonorrhoeae
Source: Hindawi journal article supplement (doi:10.1155/2020/2892734), 2020-01-01

Identification

Screening

Eligibility

Included

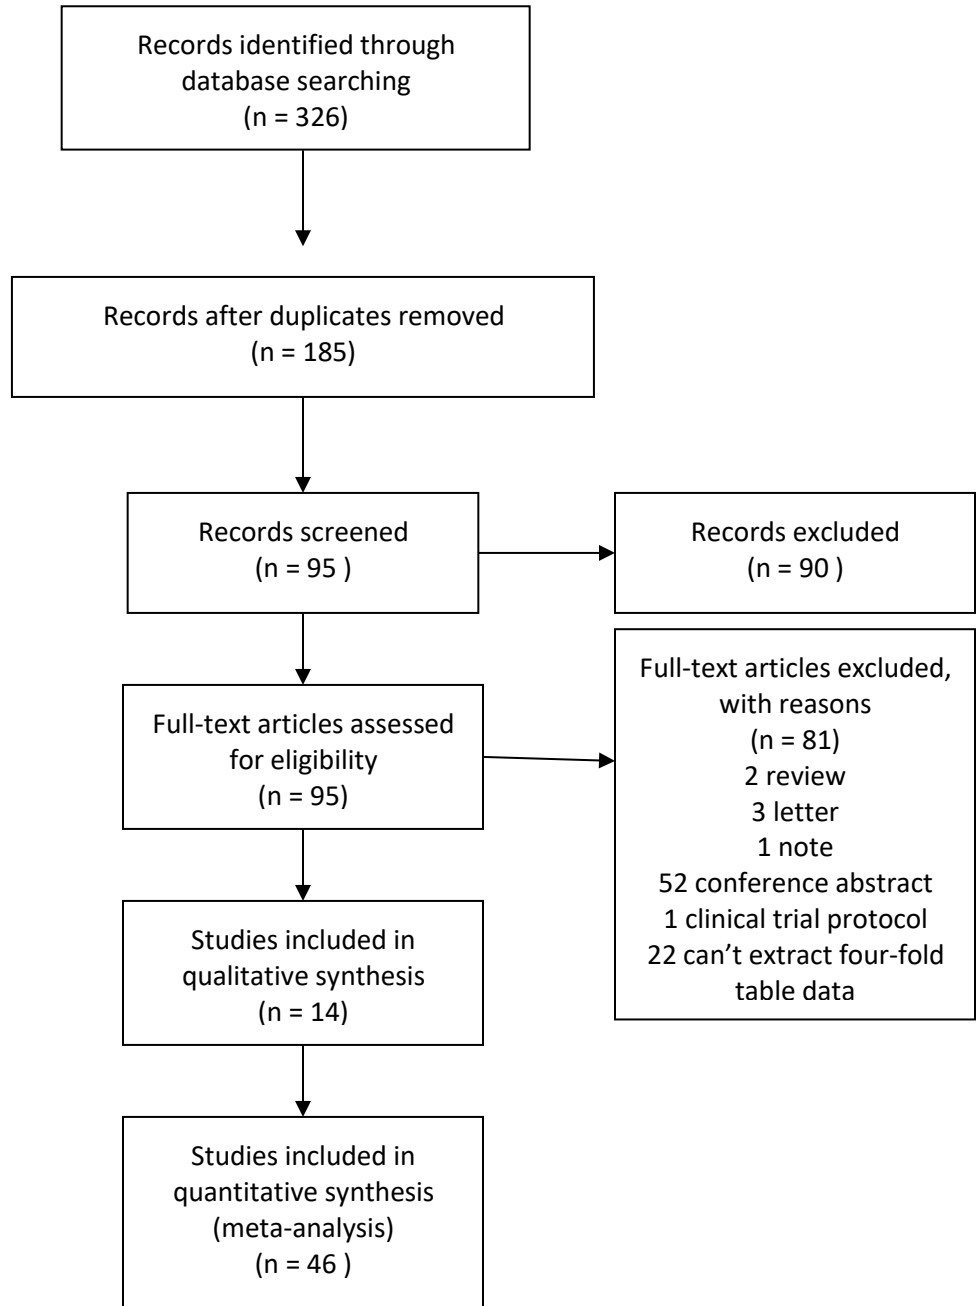

Supplement: f1 [file 2892734.f1.pdf]
